# Supplementary material for: Evaluation of the effect of the herpes zoster vaccination programme 3 years after its introduction in England: a population-based study
Source: PubMed Central journal article supplement — Lancet Public Health. 2017 Dec 22;3(2):e82–90. doi: 10.1016/S2468-2667(17)30234-7 (PMC5846879; doi:10.1016/s2468-2667(17)30234-7), 2017-12-22
Supplement: mmc1.pdf [file mmc1.pdf]

# THE LANCET

## Public Health

### Supplementary appendix

This appendix formed part of the original submission and has been peer reviewed. We post it as supplied by the authors.

Supplement to: Amirthalingam G, Andrews N, Keel P, et al. Evaluation of the effect of the herpes zoster vaccination programme 3 years after its introduction in England: a population-based study. *Lancet Public Health* 2017; published online Dec 21. [http://dx.doi.org/10.1016/S2468-2667\(17\)30234-7](http://dx.doi.org/10.1016/S2468-2667(17)30234-7).

## Appendix

### READ codes for Zoster

| READ CODE | READ term                          |
|-----------|------------------------------------|
| A53%      | Herpes zoster                      |
| AyuA4     | [X]Zoster with other complications |
| AyuA5     | [X]Zoster without complications    |
| F0112     | Herpes zoster meningitis           |
| F0309     | Herpes zoster encephalitis         |
| F3744     | Polyneuropathy in herpes zoster    |
| F5016     | Herpes zoster - otitis externa     |

### READ codes for PHN

| READ CODE | READ term                         |
|-----------|-----------------------------------|
| A531.     | Post-herpetic neuralgia           |
| A5312     | Postherpetic trigeminal neuralgia |
| A5313     | Postherpetic polyneuropathy       |
| A5315     | Postzoster neuralgia              |

### Varicella-zoster vaccines – READ codes

| Read / EMIS code | Read term                                                                                                            |
|------------------|----------------------------------------------------------------------------------------------------------------------|
| 65FY.            | Herpes zoster vaccination                                                                                            |
| 65FY0            | Herpes zoster vaccination given by other health care provider                                                        |
| n4v.             | Shingles vaccine medication codes                                                                                    |
| ZOPO52946NEMIS   | Zostavax vaccine powder and solvent for suspension for injection 0.65ml pre-filled syringes (sanofi pasteur MSD Ltd) |
| SHPO52942NEMIS   | Shingles (Herpes Zoster) vaccine (live) powder and solvent for suspension for injection 0.65ml pre-filled syringes   |
